# Supplementary material for: CTCF mutation at R567 causes developmental disorders via 3D genome rearrangement and abnormal neurodevelopment
Source: PubMed Central journal article supplement (PMC11217373; doi:10.1038/s41467-024-49684-1), 2024-07-01
Supplement: 41467_2024_49684_MOESM3_ESM.pdf [file 41467_2024_49684_MOESM3_ESM.pdf]

## **Description of Additional Supplementary Files**

Supplementary Data 1.

DEGs from brain tissues and neurons.

Supplementary Data 2.

DEGs from cortical organoids RNA-seq data.

Supplementary Data 3.

DEGs from cortex snRNA-seq data.

Supplementary Data 4.

DEGs from heart snRNA-seq data.

Supplementary Data 5.

DEGs from lung snRNA-seq data.

Supplementary Data 6.

CTCF peaks in brain, heart, and lung tissues.

Supplementary Data 7.

Quality control statistics of BL-Hi-C data and TAD boundaries.

Supplementary Data 8.

DEGs from organoid scRNA-seq data.
